# Supplementary material for: Healthy lifestyle and life expectancy with and without Alzheimer’s dementia: population based cohort study
Source: PubMed Central journal article supplement — BMJ. 2022 Apr 13;377:e068390. doi: 10.1136/bmj-2021-068390 (PMC9006322; doi:10.1136/bmj-2021-068390), 2022-04-13
Supplement: dhak068390.ww.pdf [file dhak068390.ww.pdf]

## Table of contents

**Supplementary Table 1:** Participants enrollment, population interview and clinical evaluations for the diagnosis of Alzheimer's dementia in CHAP study

**Supplementary Figure 1:** Flowchart the stratified random sampling for diagnosis of Alzheimer's dementia in Chicago Health and Aging Project (1993-2012).

**Supplementary Table 2:** Total life expectancy and life expectancy with and without Alzheimer's dementia in women with 0-1 and 4-5 healthy behaviours.

**Supplementary Table 3:** Total life expectancy and life expectancy with and without Alzheimer's dementia in men with 0-1 and 4-5 healthy behaviours.

**Supplementary Table 4:** Associations of a healthy lifestyle score with risk of Alzheimer's dementia and mortality in women and men in model additionally adjusted by body mass index, and depressive symptoms.

**Supplementary Table 5:** Associations of a healthy lifestyle score (without alcohol score) and the risk of Alzheimer's dementia and mortality in women and men

**Supplementary Figure 2:** Overall life expectancy and life expectancy with and without Alzheimer's dementia according to adherence to a healthy lifestyle (without alcohol score) in women and men

**Supplementary Figure 3:** Changes of lifestyle score across calendar time (1993-2009).

**Supplementary Table 6:** Associations of a healthy lifestyle score (1993-1999) with risk of Alzheimer's dementia and mortality in women and men.

**Supplementary Table 7:** Associations of a healthy lifestyle score with risk of Alzheimer's dementia (excluding dementia from other causes) in women and men

**Supplementary Table 8:** Associations of a healthy lifestyle score with risk of Alzheimer's dementia and death in black or African Americans and whites.

**Supplementary Table 9:** Associations of a healthy lifestyle score as a continuous variable with risk of Alzheimer's dementia and mortality in women and men.

**Supplementary Table 10:** Associations of a healthy lifestyle score with risk of Alzheimer's dementia and mortality in women and men without missing/imputed data.

**Supplementary Figure 4:** Overall life expectancy and life expectancy with and without Alzheimer's dementia according to adherence to a healthy lifestyle in women and men without missing/imputed data.

Supplementary Table 1. Participants enrollment, population interview and clinical evaluations for the diagnosis of Alzheimer's dementia in CHAP study (n=10,802; 1993-2012)

|                             | Calendar of participants enrollment, interviews, and clinical examinations |           |           |           |           |           |
|-----------------------------|----------------------------------------------------------------------------|-----------|-----------|-----------|-----------|-----------|
|                             | 1993-1997                                                                  | 1998-2000 | 2001-2003 | 2004-2006 | 2007-2009 | 2010-2012 |
| <b>Cohorts</b>              |                                                                            |           |           |           |           |           |
| Original Cohort             | 6157                                                                       | 4318      | 2942      | 2350      | 1570      | 1133      |
| Successive Cohort 1         |                                                                            |           | 1890      | 1512      | 1181      | 956       |
| Successive Cohort 2         |                                                                            |           |           | 1497      | 1068      | 853       |
| Successive Cohort 3         |                                                                            |           |           |           | 974       | 643       |
| Successive Cohort 4         |                                                                            |           |           |           |           | 284       |
| <b>Population</b>           |                                                                            |           |           |           |           |           |
| Population Interview        | 6157                                                                       | 4318      | 4832      | 5359      | 4793      | 3869      |
| <b>Clinical Evaluations</b> |                                                                            |           |           |           |           |           |
| Clinical Evaluations for AD | 731                                                                        | 842       | 643       | 734       | 656       | 415       |
| Prevalent Sample            | 731                                                                        | 0         | 127       | 82        | 62        | 54        |
| Incident Sample             | 0                                                                          | 842       | 516       | 652       | 594       | 361       |

Abbreviations: CHAP = Chicago Health and Aging Project; AD = Alzheimer's dementia

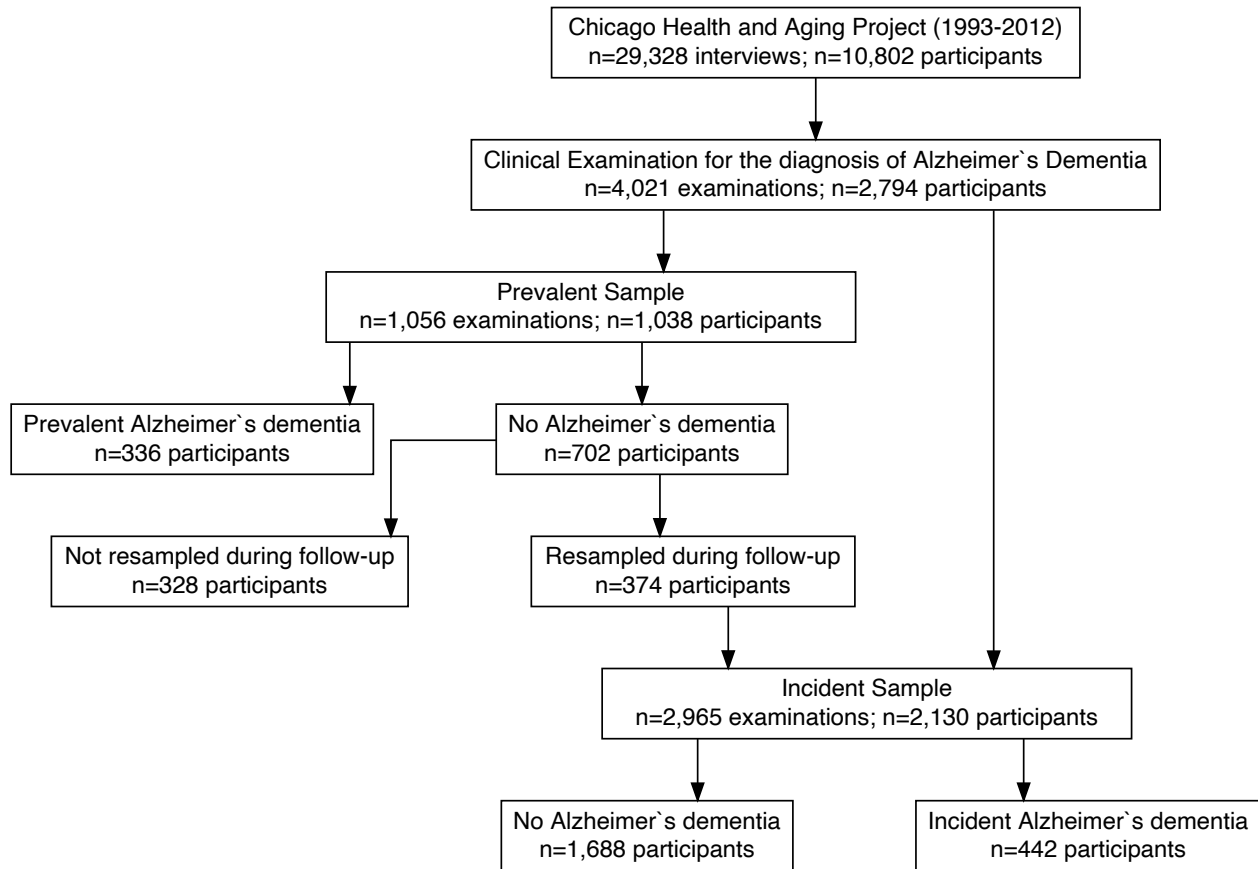

Supplementary Figure 1: Flowchart the stratified random sampling for diagnosis of Alzheimer's dementia in Chicago Health and Aging Project (1993-2012). Incident sample included participants without Alzheimer's dementia at baseline based on the cognitive assessment in-home interview and the clinical evaluation information (doi: 10.3233/jad-2003-5501). For example, an individual free of Alzheimer's dementia at the baseline had either good cognitive function in the population interview or, if the cognitive function was intermediate or poor, was free from Alzheimer's dementia based on the baseline clinical evaluation for prevalent dementia. Participants without Alzheimer's dementia at the baseline were eligible for incident sampling, but it was not required that incident sampling include participants with prior clinical evaluation since random sampling for clinical evaluation was based on strata defined by age, sex, race, and categories of cognitive function.

Supplementary Table 2: Total life expectancy and life expectancy with and without Alzheimer's dementia in women with 0-1 and 4-5 healthy lifestyle factors

| age | Participants with 0-1 healthy behaviors |                   |          |                                   | Participants with 4-5 healthy behaviors |                   |          |                                   |
|-----|-----------------------------------------|-------------------|----------|-----------------------------------|-----------------------------------------|-------------------|----------|-----------------------------------|
|     | LE without AD, years                    | LE with AD, years | Total LE | Proportion of LE lived with AD, % | LE without AD, years                    | LE with AD, years | Total LE | Proportion of LE lived with AD, % |
| 65  | 17.0                                    | 4.1               | 21.1     | 19.3                              | 21.5                                    | 2.6               | 24.2     | 10.8                              |
| 66  | 16.1                                    | 4.1               | 20.2     | 20.2                              | 20.6                                    | 2.6               | 23.3     | 11.3                              |
| 67  | 15.2                                    | 4.1               | 19.4     | 21.3                              | 19.7                                    | 2.6               | 22.4     | 11.8                              |
| 68  | 14.4                                    | 4.1               | 18.5     | 22.4                              | 18.8                                    | 2.6               | 21.5     | 12.3                              |
| 69  | 13.6                                    | 4.2               | 17.7     | 23.5                              | 17.9                                    | 2.6               | 20.6     | 12.9                              |
| 70  | 12.7                                    | 4.2               | 16.9     | 24.8                              | 17.1                                    | 2.7               | 19.7     | 13.5                              |
| 71  | 11.9                                    | 4.2               | 16.1     | 26.2                              | 16.2                                    | 2.7               | 18.9     | 14.1                              |
| 72  | 11.1                                    | 4.3               | 15.4     | 27.6                              | 15.4                                    | 2.7               | 18.0     | 14.8                              |
| 73  | 10.4                                    | 4.3               | 14.6     | 29.2                              | 14.5                                    | 2.7               | 17.2     | 15.6                              |
| 74  | 9.6                                     | 4.3               | 13.9     | 30.9                              | 13.7                                    | 2.7               | 16.4     | 16.4                              |
| 75  | 8.9                                     | 4.3               | 13.2     | 32.8                              | 12.9                                    | 2.7               | 15.6     | 17.2                              |
| 76  | 8.2                                     | 4.3               | 12.5     | 34.7                              | 12.1                                    | 2.7               | 14.8     | 18.2                              |
| 77  | 7.5                                     | 4.4               | 11.8     | 36.9                              | 11.3                                    | 2.7               | 14.0     | 19.2                              |
| 78  | 6.8                                     | 4.4               | 11.2     | 39.2                              | 10.6                                    | 2.7               | 13.3     | 20.3                              |
| 79  | 6.1                                     | 4.4               | 10.5     | 41.6                              | 9.8                                     | 2.7               | 12.5     | 21.5                              |
| 80  | 5.5                                     | 4.4               | 9.9      | 44.3                              | 9.1                                     | 2.7               | 11.8     | 22.8                              |
| 81  | 4.9                                     | 4.4               | 9.3      | 47.1                              | 8.4                                     | 2.7               | 11.1     | 24.1                              |
| 82  | 4.4                                     | 4.4               | 8.8      | 50.2                              | 7.7                                     | 2.7               | 10.4     | 25.7                              |
| 83  | 3.8                                     | 4.4               | 8.2      | 53.4                              | 7.1                                     | 2.7               | 9.8      | 27.3                              |
| 84  | 3.3                                     | 4.4               | 7.7      | 56.8                              | 6.5                                     | 2.6               | 9.1      | 29.0                              |
| 85  | 2.9                                     | 4.4               | 7.2      | 60.3                              | 5.9                                     | 2.6               | 8.5      | 30.9                              |
| 86  | 2.4                                     | 4.3               | 6.7      | 64.0                              | 5.3                                     | 2.6               | 7.9      | 33.0                              |
| 87  | 2.0                                     | 4.3               | 6.3      | 67.8                              | 4.7                                     | 2.6               | 7.3      | 35.2                              |
| 88  | 1.7                                     | 4.2               | 5.9      | 71.7                              | 4.2                                     | 2.5               | 6.8      | 37.6                              |
| 89  | 1.3                                     | 4.1               | 5.5      | 75.5                              | 3.7                                     | 2.5               | 6.2      | 40.2                              |
| 90  | 1.0                                     | 4.0               | 5.1      | 79.4                              | 3.3                                     | 2.5               | 5.7      | 43.0                              |
| 91  | 0.8                                     | 3.9               | 4.7      | 83.0                              | 2.8                                     | 2.4               | 5.2      | 45.9                              |
| 92  | 0.6                                     | 3.8               | 4.3      | 86.4                              | 2.4                                     | 2.3               | 4.8      | 49.0                              |
| 93  | 0.4                                     | 3.6               | 4.0      | 89.5                              | 2.1                                     | 2.3               | 4.3      | 52.2                              |
| 94  | 0.3                                     | 3.4               | 3.7      | 92.1                              | 1.7                                     | 2.2               | 3.9      | 55.6                              |
| 95  | 0.2                                     | 3.1               | 3.3      | 94.3                              | 1.4                                     | 2.0               | 3.4      | 58.8                              |
| 96  | 0.1                                     | 2.8               | 2.9      | 96.0                              | 1.1                                     | 1.9               | 3.0      | 62.1                              |
| 97  | 0.1                                     | 2.5               | 2.5      | 97.3                              | 0.9                                     | 1.7               | 2.6      | 65.5                              |
| 98  | 0.0                                     | 2.0               | 2.1      | 98.3                              | 0.6                                     | 1.4               | 2.1      | 68.9                              |
| 99  | 0.0                                     | 1.5               | 1.5      | 98.9                              | 0.4                                     | 1.1               | 1.5      | 72.2                              |
| 100 | 0.0                                     | 0.9               | 0.9      | 99.4                              | 0.2                                     | 0.6               | 0.9      | 75.3                              |

Abbreviations: LE, life expectancy; AD, Alzheimer's dementia. Life expectancy estimates are rounded to one decimal place. A behavior was classified as low-risk (or 'healthy') if it met the following criterion: MIND score (without alcohol) greater than 7.5, corresponding to the upper 40% of the cohort distribution; cognitive activity score greater than 3.43, corresponding to the upper 40% of the cohort distribution; not being a current smoker; moderate or vigorous exercise for equal or more than 150 minutes/week; and light-to-moderate alcohol consumption (1–15 g/day for women and 1–30 g/day for men).

Supplementary Table 3: Total life expectancy and life expectancy with and without Alzheimer's dementia in men with 0-1 and 4-5 healthy lifestyle factors

| age | Participants with 0-1 healthy behaviors |                   |          |                                   | Participants with 4-5 healthy behaviors |                   |          |                                   |
|-----|-----------------------------------------|-------------------|----------|-----------------------------------|-----------------------------------------|-------------------|----------|-----------------------------------|
|     | LE without AD, years                    | LE with AD, years | Total LE | Proportion of LE lived with AD, % | LE without AD, years                    | LE with AD, years | Total LE | Proportion of LE lived with AD, % |
| 65  | 15.3                                    | 2.1               | 17.4     | 12.0                              | 21.7                                    | 1.4               | 23.1     | 6.1                               |
| 66  | 14.5                                    | 2.1               | 16.6     | 12.7                              | 20.8                                    | 1.4               | 22.2     | 6.4                               |
| 67  | 13.6                                    | 2.1               | 15.8     | 13.5                              | 19.9                                    | 1.4               | 21.3     | 6.7                               |
| 68  | 12.8                                    | 2.1               | 15.0     | 14.3                              | 19.1                                    | 1.4               | 20.5     | 7.0                               |
| 69  | 12.1                                    | 2.2               | 14.2     | 15.2                              | 18.2                                    | 1.4               | 19.6     | 7.3                               |
| 70  | 11.3                                    | 2.2               | 13.5     | 16.2                              | 17.4                                    | 1.4               | 18.8     | 7.6                               |
| 71  | 10.6                                    | 2.2               | 12.8     | 17.2                              | 16.5                                    | 1.4               | 18.0     | 8.0                               |
| 72  | 9.8                                     | 2.2               | 12.1     | 18.3                              | 15.7                                    | 1.4               | 17.2     | 8.4                               |
| 73  | 9.2                                     | 2.2               | 11.4     | 19.6                              | 14.9                                    | 1.4               | 16.4     | 8.9                               |
| 74  | 8.5                                     | 2.2               | 10.7     | 20.9                              | 14.1                                    | 1.5               | 15.6     | 9.3                               |
| 75  | 7.8                                     | 2.3               | 10.1     | 22.4                              | 13.4                                    | 1.5               | 14.8     | 9.8                               |
| 76  | 7.2                                     | 2.3               | 9.5      | 24.0                              | 12.6                                    | 1.5               | 14.1     | 10.4                              |
| 77  | 6.6                                     | 2.3               | 8.9      | 25.7                              | 11.9                                    | 1.5               | 13.3     | 11.0                              |
| 78  | 6.0                                     | 2.3               | 8.3      | 27.6                              | 11.2                                    | 1.5               | 12.6     | 11.6                              |
| 79  | 5.5                                     | 2.3               | 7.8      | 29.7                              | 10.5                                    | 1.5               | 11.9     | 12.3                              |
| 80  | 5.0                                     | 2.3               | 7.3      | 31.9                              | 9.8                                     | 1.5               | 11.3     | 13.0                              |
| 81  | 4.5                                     | 2.3               | 6.8      | 34.4                              | 9.2                                     | 1.5               | 10.6     | 13.8                              |
| 82  | 4.0                                     | 2.4               | 6.4      | 37.0                              | 8.5                                     | 1.5               | 10.0     | 14.7                              |
| 83  | 3.6                                     | 2.4               | 5.9      | 39.9                              | 7.9                                     | 1.5               | 9.4      | 15.6                              |
| 84  | 3.2                                     | 2.4               | 5.5      | 42.9                              | 7.4                                     | 1.5               | 8.8      | 16.6                              |
| 85  | 2.8                                     | 2.4               | 5.2      | 46.0                              | 6.8                                     | 1.5               | 8.3      | 17.7                              |
| 86  | 2.4                                     | 2.4               | 4.8      | 49.4                              | 6.3                                     | 1.5               | 7.7      | 18.8                              |
| 87  | 2.1                                     | 2.4               | 4.5      | 53.1                              | 5.8                                     | 1.4               | 7.2      | 20.1                              |
| 88  | 1.8                                     | 2.4               | 4.2      | 57.1                              | 5.3                                     | 1.4               | 6.7      | 21.4                              |
| 89  | 1.5                                     | 2.4               | 3.9      | 61.3                              | 4.8                                     | 1.4               | 6.2      | 22.9                              |
| 90  | 1.2                                     | 2.4               | 3.6      | 65.7                              | 4.4                                     | 1.4               | 5.8      | 24.5                              |
| 91  | 1.0                                     | 2.4               | 3.4      | 70.2                              | 3.9                                     | 1.4               | 5.3      | 26.2                              |
| 92  | 0.8                                     | 2.3               | 3.1      | 74.5                              | 3.5                                     | 1.4               | 4.9      | 27.9                              |
| 93  | 0.6                                     | 2.3               | 2.9      | 78.5                              | 3.2                                     | 1.3               | 4.5      | 29.6                              |
| 94  | 0.5                                     | 2.2               | 2.7      | 82.0                              | 2.8                                     | 1.3               | 4.1      | 31.1                              |
| 95  | 0.4                                     | 2.1               | 2.5      | 84.6                              | 2.5                                     | 1.2               | 3.8      | 32.4                              |
| 96  | 0.3                                     | 2.0               | 2.3      | 86.6                              | 2.2                                     | 1.1               | 3.3      | 33.5                              |
| 97  | 0.2                                     | 1.8               | 2.0      | 88.8                              | 1.8                                     | 1.0               | 2.8      | 34.9                              |
| 98  | 0.2                                     | 1.6               | 1.7      | 90.8                              | 1.4                                     | 0.8               | 2.2      | 36.6                              |
| 99  | 0.1                                     | 1.3               | 1.4      | 92.7                              | 1.0                                     | 0.6               | 1.6      | 38.5                              |
| 100 | 0.0                                     | 0.8               | 0.8      | 94.3                              | 0.5                                     | 0.4               | 0.9      | 40.6                              |

Abbreviations: LE, life expectancy; AD, Alzheimer's dementia. Life expectancy estimates are rounded to one decimal place. A behavior was classified as low-risk (or 'healthy') if it met the following criterion: MIND score (without alcohol) greater than 7.5, corresponding to the upper 40% of the cohort distribution; cognitive activity score greater than 3.43, corresponding to the upper 40% of the cohort distribution; not being a current smoker; moderate or vigorous exercise for equal or more than 150 minutes/week; and light-to-moderate alcohol consumption (1–15 g/day for women and 1–30 g/day for men).

Supplementary Table 4. Associations of a healthy lifestyle score with the risk of Alzheimer's dementia and mortality in men and women in model additionally adjusted by body mass index, and depressive symptoms

| Lifestyle Score                                                       | Women                   |      |           | Men                     |      |           |
|-----------------------------------------------------------------------|-------------------------|------|-----------|-------------------------|------|-----------|
|                                                                       | Cases, No./Person-Years | HR   | 95% CI    | Cases, No./Person-Years | HR   | 95% CI    |
| <b>Transition 1</b>                                                   |                         |      |           |                         |      |           |
| <b>Risk of incident Alzheimer's dementia</b>                          |                         |      |           |                         |      |           |
| 0-1 healthy factors                                                   | 275/8,332               | 1    | reference | 164/4,715               | 1    | reference |
| 2-3                                                                   |                         | 0.75 | 0.62-0.92 |                         | 0.69 | 0.52-0.91 |
| 4-5                                                                   |                         | 0.46 | 0.34-0.62 |                         | 0.31 | 0.2-0.48  |
| <b>Transition 2</b>                                                   |                         |      |           |                         |      |           |
| <b>Risk of mortality in participants without Alzheimer's dementia</b> |                         |      |           |                         |      |           |
| 0-1 healthy factors                                                   | 787/17,753              | 1    | reference | 527/9,626               | 1    | reference |
| 2-3                                                                   |                         | 0.72 | 0.65-0.8  |                         | 0.58 | 0.5-0.67  |
| 4-5                                                                   |                         | 0.62 | 0.54-0.72 |                         | 0.48 | 0.4-0.59  |
| <b>Transition 3</b>                                                   |                         |      |           |                         |      |           |
| <b>Risk of mortality in participants with Alzheimer's dementia</b>    |                         |      |           |                         |      |           |
| 0-1 healthy factors                                                   | 424/2,521               | 1    | reference | 260/1,321               | 1    | reference |
| 2-3                                                                   |                         | 1.16 | 1.03-1.3  |                         | 0.82 | 0.68-0.98 |
| 4-5                                                                   |                         | 1.36 | 1.07-1.74 |                         | 1.06 | 0.77-1.47 |

Abbreviations: HR, hazard ratio; CI, confidence interval; No, absolute number. Models adjusted by age, race, marital status, education, APOE e4, and comorbidities, and body mass index, and depressive symptoms. Depressive symptoms were classified by Center for Epidemiologic Studies Depression (CESD score). A lifestyle factor was classified as low-risk (or 'healthy') if it met the following criterion: MIND score (without alcohol) greater than 7.5, corresponding to the upper 40% of the cohort distribution; cognitive activity score greater than 3.43, corresponding to the upper 40% of the cohort distribution; not being a current smoker; moderate or vigorous exercise for equal or more than 150 minutes/week; and light-to-moderate alcohol consumption (1–15 g/day for women and 1–30 g/day for men). Participants with Alzheimer's dementia (Transition 3) include prevalent dementia at the baseline (n=339) and incident cases (n=439) during follow-up.

Supplementary Table 5. Associations of a healthy lifestyle score (without alcohol score) and the risk of Alzheimer's dementia and mortality in women and men

| Lifestyle Score                                                       | Women                   |      |           | Men                     |      |           |
|-----------------------------------------------------------------------|-------------------------|------|-----------|-------------------------|------|-----------|
|                                                                       | Cases, No./Person-Years | HR   | 95% CI    | Cases, No./Person-Years | HR   | 95% CI    |
| <b>Transition 1</b>                                                   |                         |      |           |                         |      |           |
| <b>Risk of incident Alzheimer's dementia</b>                          |                         |      |           |                         |      |           |
| 0-1 healthy factors                                                   | 275/8,332               | 1    | reference | 164/4,715               | 1    | reference |
| 2                                                                     |                         | 0.98 | 0.8-1.2   |                         | 0.61 | 0.47-0.8  |
| 3-4                                                                   |                         | 0.49 | 0.39-0.63 |                         | 0.34 | 0.24-0.49 |
| <b>Transition 2</b>                                                   |                         |      |           |                         |      |           |
| <b>Risk of mortality in participants without Alzheimer's dementia</b> |                         |      |           |                         |      |           |
| 0-1 healthy factors                                                   | 787/17,753              | 1    | reference | 527/9,626               | 1    | reference |
| 2                                                                     |                         | 0.74 | 0.66-0.82 |                         | 0.64 | 0.56-0.74 |
| 3-4                                                                   |                         | 0.56 | 0.5-0.63  |                         | 0.59 | 0.51-0.69 |
| <b>Transition 3</b>                                                   |                         |      |           |                         |      |           |
| <b>Risk of mortality in participants with Alzheimer's dementia</b>    |                         |      |           |                         |      |           |
| 0-1 healthy factors                                                   | 424/2,521               | 1    | reference | 260/1,321               | 1    | reference |
| 2                                                                     |                         | 0.8  | 0.71-0.91 |                         | 0.91 | 0.75-1.09 |
| 3-4                                                                   |                         | 1.21 | 1.03-1.42 |                         | 1.03 | 0.78-1.35 |

Abbreviations: HR, hazard ratio; CI, confidence interval; No, absolute number. Models adjusted by age, race, education, APOE e4, and comorbidities. A behavior was classified as low-risk (or 'healthy') if it met the following criterion: MIND score (without alcohol) greater than 7.5, corresponding to the upper 40% of the cohort distribution; cognitive activity score greater than 3.43, corresponding to the upper 40% of the cohort distribution; not being a current smoker; and moderate or vigorous exercise for equal or more than 150 minutes/week. Participants with Alzheimer's dementia (Transition 3) include prevalent dementia at the baseline (n=339) and incident cases (n=439) during follow-up.

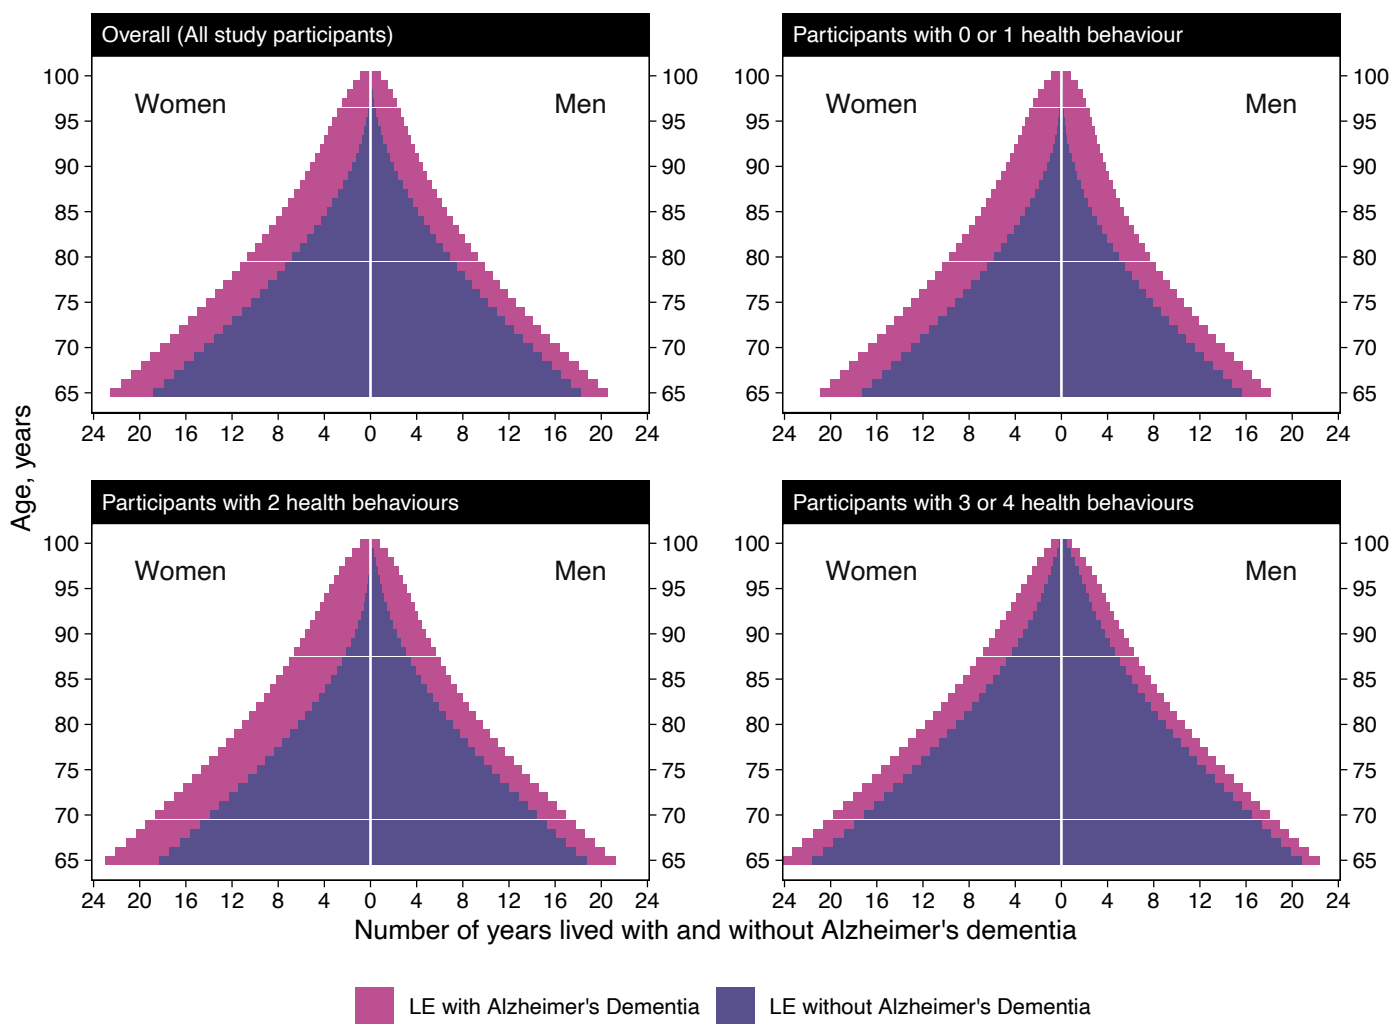

Supplementary Figure 2: Overall life expectancy and life expectancy with and without Alzheimer's dementia according to categories of lifestyle score (without alcohol score) in women and men. A behavior was classified as low-risk or 'healthy' if it met the following criterion: MIND score (without alcohol) greater than 7.5, corresponding to the upper 40% of the cohort distribution; cognitive activity score greater than 3.43, corresponding to the upper 40% of the cohort distribution; not being a current smoker; moderate or vigorous exercise for equal or more than 150 minutes/week.



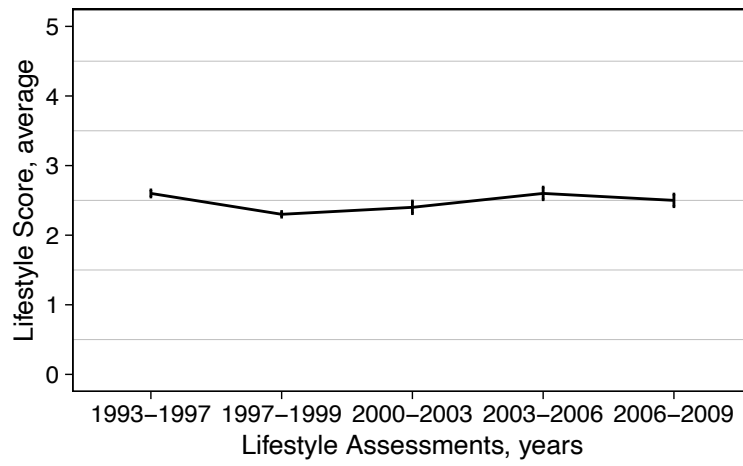

Supplementary Figure 3: Changes of lifestyle score across calendar time 1993 to 2009

Supplementary Table 6. Associations of a healthy lifestyle score (1993-1999) with the risk of Alzheimer's dementia and mortality in women and men

| Lifestyle Score                                                       | Women                   |      |           | Men                     |      |           |
|-----------------------------------------------------------------------|-------------------------|------|-----------|-------------------------|------|-----------|
|                                                                       | Cases, No./Person-Years | HR   | 95% CI    | Cases, No./Person-Years | HR   | 95% CI    |
| <b>Transition 1</b>                                                   |                         |      |           |                         |      |           |
| <b>Risk of incident Alzheimer's dementia</b>                          |                         |      |           |                         |      |           |
| 0-1 healthy factors                                                   | 240/6,842               | 1    | reference | 137/3,925               | 1    | reference |
| 2-3                                                                   |                         | 0.63 | 0.51-0.79 |                         | 0.76 | 0.55-1.04 |
| 4-5                                                                   |                         | 0.32 | 0.22-0.46 |                         | 0.41 | 0.25-0.66 |
| <b>Transition 2</b>                                                   |                         |      |           |                         |      |           |
| <b>Risk of mortality in participants without Alzheimer's dementia</b> |                         |      |           |                         |      |           |
| 0-1 healthy factors                                                   | 702/13,830              | 1    | reference | 467/7,522               | 1    | reference |
| 2-3                                                                   |                         | 0.64 | 0.57-0.72 |                         | 0.61 | 0.52-0.72 |
| 4-5                                                                   |                         | 0.6  | 0.51-0.7  |                         | 0.65 | 0.53-0.79 |
| <b>Transition 3</b>                                                   |                         |      |           |                         |      |           |
| <b>Risk of mortality in participants with Alzheimer's dementia</b>    |                         |      |           |                         |      |           |
| 0-1 healthy factors                                                   | 381/2,080               | 1    | reference | 227/1,082               | 1    | reference |
| 2-3                                                                   |                         | 1.22 | 1.07-1.38 |                         | 0.81 | 0.66-1    |
| 4-5                                                                   |                         | 1.07 | 0.81-1.41 |                         | 0.75 | 0.53-1.06 |

Abbreviations: HR, hazard ratio; CI, confidence interval; No, absolute number. Models adjusted by age, race, marital status, education, APOE e4, and comorbidities. Lifestyle factors are assessed from 1993-1999 calendar year. A behavior was classified as low-risk (or 'healthy') if it met the following criterion: MIND score (without alcohol) greater than 7.5, corresponding to the upper 40% of the cohort distribution; cognitive activity score greater than 3.43, corresponding to the upper 40% of the cohort distribution; not being a current smoker; moderate or vigorous exercise for equal or more than 150 minutes/week; and light-to-moderate alcohol consumption (1–15 g/day for women and 1–30 g/day for men). Participants with Alzheimer's dementia (Transition 3) include prevalent dementia at the baseline (n=279) and incident cases (n=377) during follow-up.

Supplementary Table 7. Associations of a healthy lifestyle score with the risk of Alzheimer's dementia (excluding dementia from other causes) in women and men

| Lifestyle Score                              | Women                   |      |           | Men                     |      |           |
|----------------------------------------------|-------------------------|------|-----------|-------------------------|------|-----------|
|                                              | Cases, No./Person-Years | HR   | 95% CI    | Cases, No./Person-Years | HR   | 95% CI    |
| <b>Transition 1</b>                          |                         |      |           |                         |      |           |
| <b>Risk of incident Alzheimer's dementia</b> |                         |      |           |                         |      |           |
| 0-1 healthy factors                          | 275/8,294               | 1    | reference | 164/4,682               | 1    | reference |
| 2-3                                          |                         | 0.72 | 0.59-0.87 |                         | 0.7  | 0.53-0.92 |
| 4-5                                          |                         | 0.44 | 0.32-0.59 |                         | 0.29 | 0.19-0.46 |

Abbreviations: HR, hazard ration; CI, confidence interval; No, absolute number. Models adjusted by age, race, marital status, education, APOE e4, and comorbidities. A behavior was classified as low-risk (or 'healthy') if it met the following criterion: MIND score (without alcohol) greater than 7.5, corresponding to the upper 40% of the cohort distribution; cognitive activity score greater than 3.43, corresponding to the upper 40% of the cohort distribution; not being a current smoker; moderate or vigorous exercise for equal or more than 150 minutes/week; and light-to-moderate alcohol consumption (1–15 g/day for women and 1–30 g/day for men). Alzheimer's dementia from other causes (e.g., atypical dementia) are excluded (n=12)

Supplementary Table 8. Associations of a healthy lifestyle score with risk of Alzheimer's dementia and death in black or African Americans and whites.

| Lifestyle Score                                                       | Black or African Americans |      |           | Whites                  |      |           |
|-----------------------------------------------------------------------|----------------------------|------|-----------|-------------------------|------|-----------|
|                                                                       | Cases, No./Person-Years    | HR   | 95% CI    | Cases, No./Person-Years | HR   | 95% CI    |
| <b>Transition 1</b>                                                   |                            |      |           |                         |      |           |
| <b>Risk of incident Alzheimer's dementia</b>                          |                            |      |           |                         |      |           |
| 0-1 healthy factors                                                   | 274/7,104                  | 1    | reference | 165/5,944               | 1    | reference |
| 2-3                                                                   |                            | 0.93 | 0.77-1.11 |                         | 0.35 | 0.26-0.48 |
| 4-5                                                                   |                            | 0.37 | 0.26-0.52 |                         | 0.26 | 0.17-0.39 |
| <b>Transition 2</b>                                                   |                            |      |           |                         |      |           |
| <b>Risk of mortality in participants without Alzheimer's dementia</b> |                            |      |           |                         |      |           |
| 0-1 healthy factors                                                   | 630/15,218                 | 1    | reference | 684/12,161              | 1    | reference |
| 2-3                                                                   |                            | 0.67 | 0.6-0.74  |                         | 0.56 | 0.48-0.64 |
| 4-5                                                                   |                            | 0.51 | 0.43-0.61 |                         | 0.49 | 0.42-0.59 |
| <b>Transition 3</b>                                                   |                            |      |           |                         |      |           |
| <b>Risk of mortality in participants with Alzheimer's dementia</b>    |                            |      |           |                         |      |           |
| 0-1 healthy factors                                                   | 426/2,788                  | 1    | reference | 258/1,055               | 1    | reference |
| 2-3                                                                   |                            | 0.95 | 0.85-1.06 |                         | 1.15 | 0.94-1.4  |
| 4-5                                                                   |                            | 1.22 | 0.91-1.63 |                         | 1.13 | 0.86-1.49 |

Abbreviations: HR, hazard ratio; CI, confidence interval; No, absolute number. Models adjusted by age, sex, marital status, education, APOE e4, and comorbidities. A behavior was classified as low-risk (or 'healthy') if it met the following criterion: MIND score (without alcohol) greater than 7.5, corresponding to the upper 40% of the cohort distribution; cognitive activity score greater than 3.43, corresponding to the upper 40% of the cohort distribution; not being a current smoker; moderate or vigorous exercise for equal or more than 150 minutes/week; and light-to-moderate alcohol consumption (1–15 g/day for women and 1–30 g/day for men).

Supplementary Table 9. Associations of a healthy lifestyle score as a continuous variable with the risk of Alzheimer's dementia and mortality in men and women

| Lifestyle Score                                                       | Women                   |      |           | Men                     |      |           |
|-----------------------------------------------------------------------|-------------------------|------|-----------|-------------------------|------|-----------|
|                                                                       | Cases, No./Person-Years | HR   | 95% CI    | Cases, No./Person-Years | HR   | 95% CI    |
| <b>Transition 1</b>                                                   |                         |      |           |                         |      |           |
| <b>Risk of incident Alzheimer's dementia</b>                          |                         |      |           |                         |      |           |
| Continuous                                                            | 275/8,332               | 0.75 | 0.69-0.82 | 164/4,715               | 0.72 | 0.64-0.81 |
| <b>Transition 2</b>                                                   |                         |      |           |                         |      |           |
| <b>Risk of mortality in participants without Alzheimer's dementia</b> |                         |      |           |                         |      |           |
| Continuous                                                            | 787/17,753              | 0.84 | 0.8-0.87  | 527/9,626               | 0.77 | 0.73-0.81 |
| <b>Transition 3</b>                                                   |                         |      |           |                         |      |           |
| <b>Risk of mortality in participants with Alzheimer's dementia</b>    |                         |      |           |                         |      |           |
| Continuous                                                            | 424/2,521               | 1.07 | 1.01-1.13 | 260/1,321               | 0.92 | 0.84-1    |

Abbreviations: HR, hazard ratio; CI, confidence interval; No, absolute number. Models adjusted by age, race, marital status, education, APOE e4, and comorbidities. A lifestyle factor was classified as low-risk (or 'healthy') if it met the following criterion: MIND score (without alcohol) greater than 7.5, corresponding to the upper 40% of the cohort distribution; cognitive activity score greater than 3.43, corresponding to the upper 40% of the cohort distribution; not being a current smoker; moderate or vigorous exercise for equal or more than 150 minutes/week; and light-to-moderate alcohol consumption (1–15 g/day for women and 1–30 g/day for men). Participants with Alzheimer's dementia (Transition 3) include prevalent dementia at the baseline (n=339) and incident cases (n=439) during follow-up.

Supplementary Table 10. Associations of a healthy lifestyle score with the risk of Alzheimer's dementia and mortality in women and men without missing/imputed data

| Lifestyle Score                                                       | Women                   |      |           | Men                     |      |           |
|-----------------------------------------------------------------------|-------------------------|------|-----------|-------------------------|------|-----------|
|                                                                       | Cases, No./Person-Years | HR   | 95% CI    | Cases, No./Person-Years | HR   | 95% CI    |
| <b>Transition 1</b>                                                   |                         |      |           |                         |      |           |
| <b>Risk of incident Alzheimer's dementia</b>                          |                         |      |           |                         |      |           |
| 0-1 healthy factors                                                   | 246/7,322               | 1    | reference | 146/4,214               | 1    | reference |
| 2-3                                                                   |                         | 0.66 | 0.54-0.81 |                         | 0.65 | 0.48-0.87 |
| 4-5                                                                   |                         | 0.44 | 0.32-0.6  |                         | 0.27 | 0.17-0.44 |
| <b>Transition 2</b>                                                   |                         |      |           |                         |      |           |
| <b>Risk of mortality in participants without Alzheimer's dementia</b> |                         |      |           |                         |      |           |
| 0-1 healthy factors                                                   | 706/15,670              | 1    | reference | 475/8,594               | 1    | reference |
| 2-3                                                                   |                         | 0.69 | 0.61-0.77 |                         | 0.58 | 0.5-0.68  |
| 4-5                                                                   |                         | 0.6  | 0.51-0.7  |                         | 0.52 | 0.42-0.63 |
| <b>Transition 3</b>                                                   |                         |      |           |                         |      |           |
| <b>Risk of mortality in participants with Alzheimer's dementia</b>    |                         |      |           |                         |      |           |
| 0-1 healthy factors                                                   | 305/1,949               | 1    | reference | 191/1,073               | 1    | reference |
| 2-3                                                                   |                         | 1.08 | 0.93-1.24 |                         | 0.6  | 0.48-0.75 |
| 4-5                                                                   |                         | 1.6  | 1.23-2.09 |                         | 0.66 | 0.45-0.96 |

Abbreviations: HR, hazard ratio; CI, confidence interval; No, absolute number. Models adjusted by age, race, marital status, education, APOE e4, and comorbidities. A behavior was classified as low-risk (or 'healthy') if it met the following criterion: MIND score (without alcohol) greater than 7.5, corresponding to the upper 40% of the cohort distribution; cognitive activity score greater than 3.43, corresponding to the upper 40% of the cohort distribution; not being a current smoker; moderate or vigorous exercise for equal or more than 150 minutes/week; and light-to-moderate alcohol consumption (1–15 g/day for women and 1–30 g/day for men). Participants with Alzheimer's dementia (Transition 3) include prevalent dementia at the baseline (n=172) and incident cases (n=392) during follow-up.

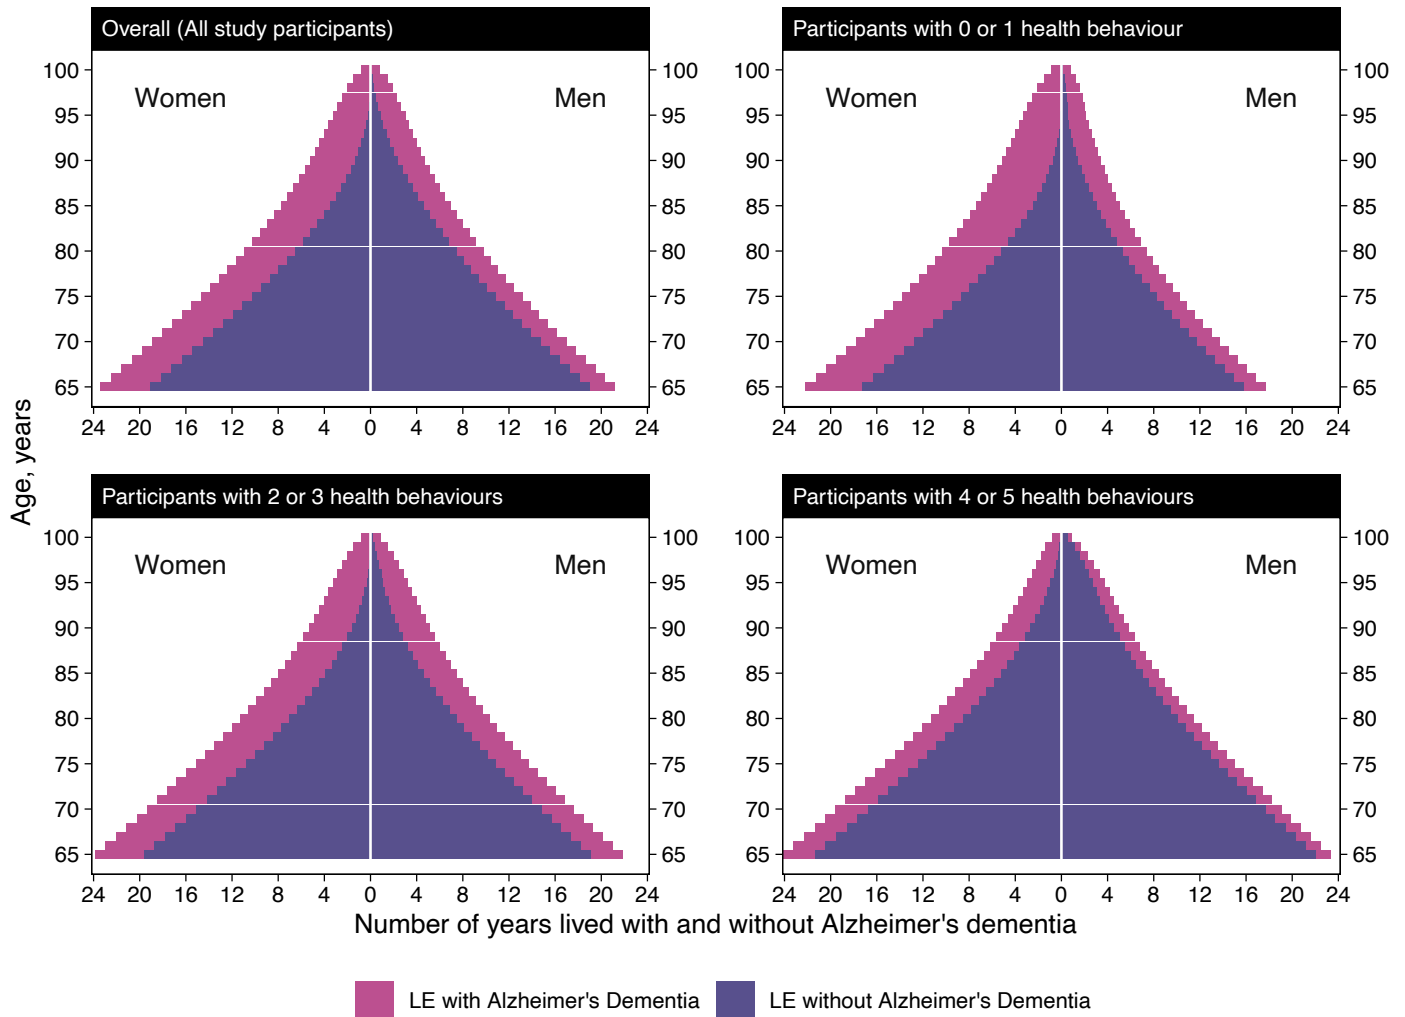

Supplementary Figure 4: Overall life expectancy and life expectancy with and without Alzheimer's dementia according to categories of lifestyle score in women and men without missing/imputed data. A behavior was classified as low-risk or 'healthy' if it met the following criterion: MIND score (without alcohol) greater than 7.5, corresponding to the upper 40% of the cohort distribution; cognitive activity score greater than 3.43, corresponding to the upper 40% of the cohort distribution; not being a current smoker; moderate or vigorous exercise for equal or more than 150 minutes/week; and light-to-moderate alcohol consumption (1–15 g/day for women and 1–30 g/day for men).
